# Supplementary material
Source: MDPI journal article supplement (https://www.mdpi.com/1424-8247/17/2/255)
Supplement: s1 [file s1]

# **Anti-bacterial activity of green synthesised silver and zinc oxide nanoparticles against *Propionibacterium acnes***

Hafez Al-Momani<sup>1\*</sup>, Muhannad I. Massadeh<sup>2</sup>, Muna Almasri<sup>2</sup>, Dua'a Al Balawi<sup>3</sup>, Iman Aolymat<sup>4</sup>  
 Saja Hamed<sup>5</sup>, Borhan Aldeen Albiss<sup>6</sup>, Lugain Ibrahim<sup>3</sup>, Hadeel Al Balawi<sup>3</sup>, Sameer Al Haj  
 Mahmoud<sup>7</sup>.

**Supplementary figure 1: color change in the reaction mixture indicating formation of Ag-NPs and ZnO-NPs**

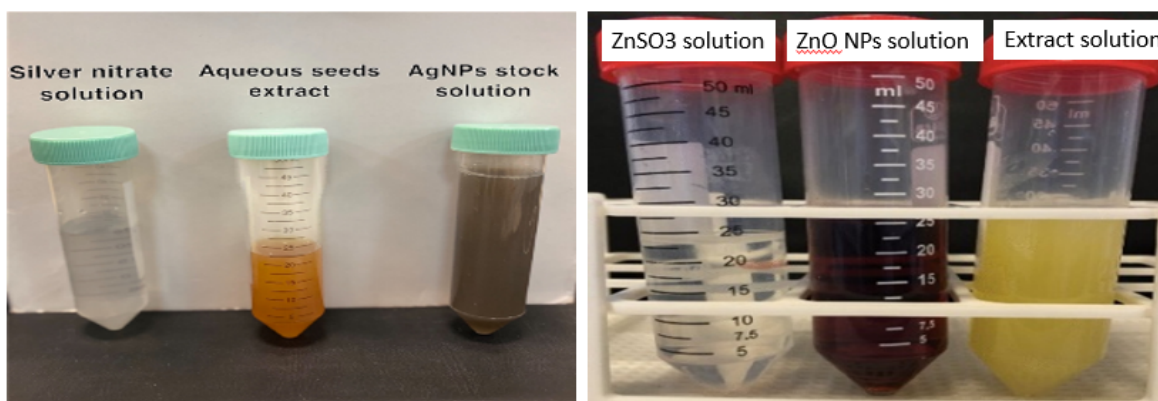

|      | Odc   | OD of positive control | 2*Odc | 4*Odc |                           |
|------|-------|------------------------|-------|-------|---------------------------|
| ATCC | 0.096 | 0.294                  | 0.192 | 0.384 | moderate-biofilm producer |
| PA1  | 0.058 | 0.381                  | 0.116 | 0.232 | strong-biofilm producer   |
| PA2  | 0.062 | 0.34                   | 0.124 | 0.248 | strong-biofilm producer   |

Supplementary table 1: Biofilm forming ability of *P.acne*
